# Supplementary material
Source: PubMed Central journal article supplement (PMC3813398)
Supplement: peds.2013-1227_peds.2013-1227SupplementaryData.pdf [file peds.2013-1227_peds.2013-1227SupplementaryData.pdf]

# Supplemental Information

**SUPPLEMENTAL TABLE 4** Expanded Version of Table 2 From Article With All Coefficients for Control Variables Included: Predictors of Child's Externalizing CBCL Scores at Age 9

| Variable                                                                         | Model 1: Spanking (SE) | Model 2: Child and Family Characteristics (SE) | Model 3: Maternal Mental Health and Cognition (SE) | Model 4: Earlier Child Behavior (SE) |
|----------------------------------------------------------------------------------|------------------------|------------------------------------------------|----------------------------------------------------|--------------------------------------|
| Mother's more frequent spanking at age 3 <sup>a</sup>                            | 1.25* (0.55)           | 1.02 <sup>+</sup> (0.54)                       | 0.81 (0.53)                                        | 0.21 (0.50)                          |
| Mother's less frequent spanking at age 3 <sup>a</sup>                            | 0.38 (0.36)            | 0.28 (0.35)                                    | 0.14 (0.34)                                        | -0.04 (0.33)                         |
| Mother's more frequent spanking at age 5 <sup>a</sup>                            | 3.79*** (0.74)         | 3.15*** (0.73)                                 | 2.66*** (0.72)                                     | 1.83** (0.68)                        |
| Mother's less frequent spanking at age 5 <sup>a</sup>                            | 1.59*** (0.35)         | 1.42*** (0.34)                                 | 1.17** (0.34)                                      | 0.65* (0.32)                         |
| Father's more frequent spanking at age 3 <sup>a</sup>                            | 0.26 (0.74)            | 0.23 (0.73)                                    | 0.02 (0.72)                                        | -0.24 (0.68)                         |
| Father's less frequent spanking at age 3 <sup>a</sup>                            | 0.36 (0.40)            | 0.31 (0.40)                                    | 0.21 (0.39)                                        | -0.19 (0.37)                         |
| Father's more frequent spanking at age 5 <sup>a</sup>                            | -0.31 (1.12)           | -0.33 (1.10)                                   | -0.33 (1.07)                                       | 0.18 (1.02)                          |
| Father's less frequent spanking at age 5 <sup>a</sup>                            | -0.14 (0.43)           | 0.01 (0.42)                                    | 0.17 (0.41)                                        | 0.25 (0.39)                          |
| Child is a girl                                                                  |                        | -1.31*** (0.30)                                | -1.28*** (0.29)                                    | -1.08*** (0.28)                      |
| Child's age, mo                                                                  |                        | 0.03 (0.04)                                    | 0.02 (0.04)                                        | 0.04 (0.04)                          |
| Child is low birth wt                                                            |                        | -0.63 (0.52)                                   | -0.31 (0.51)                                       | -0.32 (0.49)                         |
| Child is first born                                                              |                        | -0.12 (0.37)                                   | -0.15 (0.37)                                       | 0.02 (0.35)                          |
| Emotional child temperament at age 1                                             |                        | 0.17*** (0.05)                                 | 0.13** (0.05)                                      | -0.02 (0.05)                         |
| Mother's age at birth, y                                                         |                        | -0.02 (0.03)                                   | -0.02 (0.03)                                       | -0.01 (0.03)                         |
| Married at baseline and age 9 <sup>b</sup>                                       |                        | -1.45* (0.63)                                  | -1.05 (0.62)                                       | -0.66 (0.59)                         |
| Cohabiting at baseline and married or cohabiting at age 9 <sup>b</sup>           |                        | -0.08 (0.56)                                   | 0.16 (0.55)                                        | 0.26 (0.52)                          |
| Living together at baseline, not at age 9 <sup>b</sup>                           |                        | 0.44 (0.41)                                    | 0.49 (0.41)                                        | 0.54 (0.39)                          |
| Living separate baseline, together at age 9 <sup>b</sup>                         |                        | 0.21 (0.67)                                    | 0.34 (0.66)                                        | 0.45 (0.63)                          |
| Mother is black, non-Hispanic <sup>c</sup>                                       |                        | -1.24** (0.43)                                 | -1.02* (0.43)                                      | -0.87* (0.40)                        |
| Mother is Hispanic <sup>c</sup>                                                  |                        | -0.87 (0.52)                                   | -0.49 (0.52)                                       | -0.62 (0.49)                         |
| Mother is other race or ethnicity <sup>c</sup>                                   |                        | 0.41 (0.94)                                    | 0.32 (0.92)                                        | -0.29 (0.87)                         |
| Mother completed high school or GED <sup>d</sup>                                 |                        | 0.01 (0.40)                                    | 0.04 (0.39)                                        | 0.11 (0.37)                          |
| Mother some college or trade school <sup>d</sup>                                 |                        | -0.39 (0.42)                                   | -0.48 (0.43)                                       | -0.21 (0.41)                         |
| Mother has BA or more <sup>d</sup>                                               |                        | 0.56 (0.70)                                    | 0.27 (0.71)                                        | 0.44 (0.66)                          |
| Household income to need ratio                                                   |                        | -0.17* (0.08)                                  | -0.17* (0.08)                                      | -0.16* (0.08)                        |
| Mother is not US born                                                            |                        | -0.07 (0.57)                                   | 0.11 (0.57)                                        | 0.37 (0.54)                          |
| Mother reported living with both parents at age 15                               |                        | -0.10 (0.33)                                   | -0.09 (0.33)                                       | -0.06 (0.31)                         |
| Mother worked in past 2 wk                                                       |                        | -0.55 (0.32)                                   | -0.38 (0.32)                                       | -0.41 (0.30)                         |
| Number of other adults in household at age 9                                     |                        | -0.26 (0.19)                                   | -0.28 (0.19)                                       | -0.32 (0.18)                         |
| Number of other children in household at age 9                                   |                        | 0.11 (0.12)                                    | -0.00 (0.12)                                       | -0.02 (0.12)                         |
| Maternal prenatal drugs, alcohol, or smoking                                     |                        | 1.64*** (0.40)                                 | 1.35** (0.39)                                      | 0.91* (0.37)                         |
| Mother reported some IPV before child's birth                                    |                        | 0.53 (0.62)                                    | 0.21 (0.61)                                        | 0.02 (0.58)                          |
| Birth father supportive during pregnancy                                         |                        | -0.27** (0.10)                                 | -0.19 <sup>+</sup> (0.10)                          | -0.09 (0.10)                         |
| Late starting or no prenatal care                                                |                        | -0.18 (0.41)                                   | -0.13 (0.40)                                       | -0.04 (0.38)                         |
| Low maternal stress at age 5                                                     |                        |                                                | -0.40*** (0.06)                                    | -0.31*** (0.05)                      |
| Some indication of maternal depression or general anxiety disorder over past 9 y |                        |                                                | 1.10*** (0.32)                                     | 0.71* (0.30)                         |
| Mother's impulsivity at age 5                                                    |                        |                                                | -0.22 <sup>+</sup> (0.12)                          | -0.15 (0.11)                         |
| Mother's WAIS-R similarities score at age 3                                      |                        |                                                | 0.14* (0.06)                                       | 0.14* (0.06)                         |
| Child's externalizing CBCL at age 3                                              |                        |                                                |                                                    | 0.28*** (0.02)                       |
| Constant                                                                         | 4.78*** (0.31)         | 6.11 (4.86)                                    | 11.39* (4.91)                                      | 4.32 (4.68)                          |
| Observations                                                                     | 1933                   | 1933                                           | 1933                                               | 1933                                 |
| R <sup>2</sup>                                                                   | 0.04                   | 0.10                                           | 0.14                                               | 0.23                                 |

<sup>a</sup> Omitted category is Parent not spanking (all models also include controls for father absent at age 3 and father absent at age 5 interviews).

<sup>b</sup> Omitted category is Not living with father at baseline or at age 9.

<sup>c</sup> Omitted category is Mother is white, non-Hispanic.

<sup>d</sup> Omitted category is Mother did not finish high school.

\*\*\*  $P < .001$ ;

\*\*  $P < .01$ ;

\*  $P < .05$ ;

+  $P < .07$ .

**SUPPLEMENTAL TABLE 5** Expanded Version of Table 3 From Article With All Coefficients for Control Variables Included: Predictors of Child's Standardized PPVT Score at Age 9

| Variable                                                                         | Model 1: Spanking (SE)    | Model 2: Child and Family Characteristics (SE) | Model 3: Maternal Mental Health and Cognition (SE) | Model 4: Earlier Child Behavior (SE) |
|----------------------------------------------------------------------------------|---------------------------|------------------------------------------------|----------------------------------------------------|--------------------------------------|
| Mother's more frequent spanking at age 3 <sup>a</sup>                            | -1.20 (1.32)              | -1.31 (1.15)                                   | -0.95 (1.15)                                       | -0.37 (1.09)                         |
| Mother's less frequent spanking at age 3 <sup>a</sup>                            | 0.65 (0.86)               | 0.49 (0.75)                                    | 0.54 (0.75)                                        | 0.30 (0.71)                          |
| Mother's more frequent spanking at age 5 <sup>a</sup>                            | -1.40 (1.82)              | -1.65 (1.61)                                   | -1.09 (1.61)                                       | -0.92 (1.52)                         |
| Mother's less frequent spanking at age 5 <sup>a</sup>                            | -1.11 (0.83)              | -0.00 (0.73)                                   | 0.22 (0.73)                                        | 0.22 (0.69)                          |
| Father's more frequent spanking at age 3 <sup>a</sup>                            | 0.92 (1.77)               | 0.32 (1.56)                                    | 0.20 (1.55)                                        | -0.56 (1.46)                         |
| Father's less frequent spanking at age 3 <sup>a</sup>                            | 0.36 (0.97)               | 0.22 (0.85)                                    | 0.24 (0.85)                                        | 0.26 (0.80)                          |
| Father's more frequent spanking at age 5 <sup>a</sup>                            | -5.06 <sup>+</sup> (2.78) | -5.65* (2.44)                                  | -5.70* (2.42)                                      | -4.21 <sup>+</sup> (2.29)            |
| Father's less frequent spanking at age 5 <sup>a</sup>                            | -0.70 (1.02)              | -1.42 (0.90)                                   | -1.32 (0.89)                                       | -0.79 (0.84)                         |
| Child is a girl                                                                  |                           | -0.14 (0.64)                                   | -0.23 (0.64)                                       | -0.83 (0.60)                         |
| Child's age, mo                                                                  |                           | -0.06 (0.09)                                   | -0.10 (0.09)                                       | -0.09 (0.08)                         |
| Child is low birth wt                                                            |                           | -1.82 (1.13)                                   | -1.70 (1.12)                                       | -0.77 (1.06)                         |
| Child is first born                                                              |                           | 1.43 (0.81)                                    | 1.12 (0.81)                                        | 0.90 (0.76)                          |
| Emotional child temperament at age 1                                             |                           | -0.32** (0.10)                                 | -0.28** (0.10)                                     | -0.17 (0.10)                         |
| Mother's age at birth, y                                                         |                           | 0.02 (0.07)                                    | 0.03 (0.07)                                        | 0.05 (0.07)                          |
| Married at baseline and age 9 <sup>b</sup>                                       |                           | 2.17 (1.38)                                    | 1.72 (1.38)                                        | 1.37 (1.30)                          |
| Cohabiting at baseline and married or cohabiting at age 9 <sup>b</sup>           |                           | 2.15+ (1.18)                                   | 2.03 (1.18)                                        | 2.09+ (1.11)                         |
| Living together at baseline, not at age 9 <sup>b</sup>                           |                           | -1.31 (0.87)                                   | -1.30 (0.86)                                       | -1.40 (0.81)                         |
| Living separate baseline, together at age 9 <sup>b</sup>                         |                           | 0.12 (1.43)                                    | -0.16 (1.42)                                       | -0.56 (1.34)                         |
| Mother is black, non-Hispanic <sup>c</sup>                                       |                           | -9.00*** (0.94)                                | -8.38*** (0.94)                                    | -6.48*** (0.90)                      |
| Mother is Hispanic <sup>c</sup>                                                  |                           | -7.48*** (1.14)                                | -6.90*** (1.14)                                    | -5.01*** (1.08)                      |
| Mother is other race or ethnicity <sup>c</sup>                                   |                           | -2.07 (2.02)                                   | -1.96 (2.00)                                       | -1.45 (1.89)                         |
| Mother completed high school or GED <sup>d</sup>                                 |                           | 0.61 (0.84)                                    | 0.27 (0.84)                                        | 0.79 (0.79)                          |
| Mother some college or trade school <sup>d</sup>                                 |                           | 5.37*** (0.92)                                 | 4.20*** (0.94)                                     | 3.29*** (0.89)                       |
| Mother has BA or more <sup>d</sup>                                               |                           | 6.55*** (1.53)                                 | 4.87** (1.55)                                      | 2.67 <sup>+</sup> (1.48)             |
| Household income to need ratio                                                   |                           | 0.66*** (0.18)                                 | 0.63*** (0.18)                                     | 0.48** (0.17)                        |
| Mother is not US born                                                            |                           | -0.01 (1.41)                                   | 0.93 (1.41)                                        | 2.42 <sup>+</sup> (1.33)             |
| Mother lived with both parents at age 15                                         |                           | -0.00 (0.72)                                   | 0.26 (0.72)                                        | 0.09 (0.68)                          |
| Mother worked in past 2 wk                                                       |                           | 1.67* (0.69)                                   | 1.57* (0.68)                                       | 1.55* (0.64)                         |
| Number of other adults in household at age 9                                     |                           | -0.05 (0.41)                                   | -0.05 (0.41)                                       | -0.06 (0.38)                         |
| Number of other children in household at age 9                                   |                           | -0.64* (0.26)                                  | -0.66* (0.26)                                      | -0.49* (0.24)                        |
| Maternal prenatal drugs, alcohol, or smoking                                     |                           | 0.57 (0.85)                                    | 0.48 (0.85)                                        | 0.53 (0.81)                          |
| Mother reported IPV before child's birth                                         |                           | 1.94 (1.32)                                    | 2.00 (1.31)                                        | 0.86 (1.24)                          |
| Birth father supportive during pregnancy                                         |                           | -0.04 (0.22)                                   | -0.09 (0.22)                                       | -0.16 (0.21)                         |
| Late starting or no prenatal care                                                |                           | -0.09 (0.86)                                   | -0.05 (0.85)                                       | 0.17 (0.81)                          |
| Low maternal stress at age 5                                                     |                           |                                                | 0.09 (0.12)                                        | 0.04 (0.12)                          |
| Some indication of maternal depression or general anxiety disorder over past 9 y |                           |                                                | -0.02 (0.69)                                       | 0.54 (0.65)                          |
| Mother's impulsivity age 5                                                       |                           |                                                | 0.26 (0.26)                                        | 0.39 (0.24)                          |
| Mother's WAIS-R Similarities score at age 3                                      |                           |                                                | 0.56*** (0.14)                                     | 0.47*** (0.13)                       |
| Cognitive stimulating parenting at age 1                                         |                           |                                                | 0.78** (0.24)                                      | 0.50* (0.23)                         |
| Child's externalizing CBCL at age 3                                              |                           |                                                |                                                    | -0.08 <sup>+</sup> (0.04)            |
| Child's PPVT scores at age 3                                                     |                           |                                                |                                                    | 0.27*** (0.02)                       |
| Constant                                                                         | 95.51*** (0.74)           | 106.75*** (10.64)                              | 99.10*** (10.89)                                   | 75.96*** (10.49)                     |
| Observations                                                                     | 1532                      | 1532                                           | 1532                                               | 1532                                 |
| R <sup>2</sup>                                                                   | 0.031                     | 0.28                                           | 0.30                                               | 0.38                                 |

<sup>a</sup> Omitted category is Parent not spanking (all models also include controls for father absent at age 3 and father absent at age 5 interviews).

<sup>b</sup> Omitted category is Not living with father at baseline or at age 9.

<sup>c</sup> Omitted category is Mother is white, non-Hispanic.

<sup>d</sup> Omitted category is Mother did not finish high school.

\*\*\*  $P < .001$ ;

\*\*  $P < .01$ ;

\*  $P < .05$ ;

+  $P < .07$ .
